# Supplementary material
Source: publisher site journal article supplement (https://www.dovepress.com/article/575242)

**Supplementary File**

**Table S1: The final pharmacophore models generated by the RLPG method and their ROC results with corresponding qualitative evaluations**

| Crystal Structure | Water at Active Site | Pharmacophore no. | Sensitivity | Specificity | ROC AUC | ROC Evaluation |
| --- | --- | --- | --- | --- | --- | --- |
| 3VW9 | With Water | 2 | 0.917 | 1.000 | 0.951 | Excellent |
| 6 | 0.917 | 0.727 | 0.917 | Excellent |
| 8 | 0.917 | 0.727 | 0.909 | Excellent |
| Without Water | 2 | 1.000 | 0.545 | 0.864 | Good |
| 8 | 0.909 | 0.636 | 0.879 | Good |
| 9 | 0.909 | 0.727 | 0.913 | Excellent |
| 3W0T | With Water | 5 | 0.917 | 0.727 | 0.932 | Excellent |
| 11 | 0.750 | 0.818 | 0.886 | Good |
| Without Water | - | - | - | - | - |
| 7WT2 | With Water | 1 | 0.917 | 0.778 | 0.856 | Good |
| Without Water | - | - | - | - | - |

**Table S2: The final pharmacophore models generated by the IG method and their ROC results with corresponding qualitative evaluations**

| Crystal Structure | Water at Active Site | Pharmacophore no. | Sensitivity | Specificity | ROC AUC | ROC Evaluation |
| --- | --- | --- | --- | --- | --- | --- |
| 3VW9 | With Water | 1 | 0.750 | 0.818 | 0.818 | Good |
| Without Water | 1 | 0.917 | 0.778 | 0.884 | Good |
| 2 | 1.000 | 0.778 | 0.833 | Good |
| 8 | 0.917 | 0.778 | 0.829 | Good |
| 3W0T | With Water | 6 | 1.000 | 0.545 | 0.932 | Excellent |
| 19 | 1.000 | 0.545 | 0.955 | Excellent |
| Without Water | 3 | 1.000 | 0.455 | 0.864 | Good |
| 4 | 1.000 | 0.545 | 0.932 | Excellent |
| 7WT2 | With Water | 39 | 0.833 | 0.778 | 0.926 | Excellent |
| Without Water | 3 | 0.667 | 0.909 | 0.889 | Good |

**Figure S1.** Pharmacophore models generated using the RLPG method and their corresponding ROC curves based on the following GLO-I crystal structures: PDB IDs 3VW9, 3W0T, and 7WT2. Pharmacophore features are shown as follows: HBA (green), HBD (magenta), ZBF (light purple), AR (brown), HA (blue). The numbers denote the pharmacophore model identifiers used in this study.

**
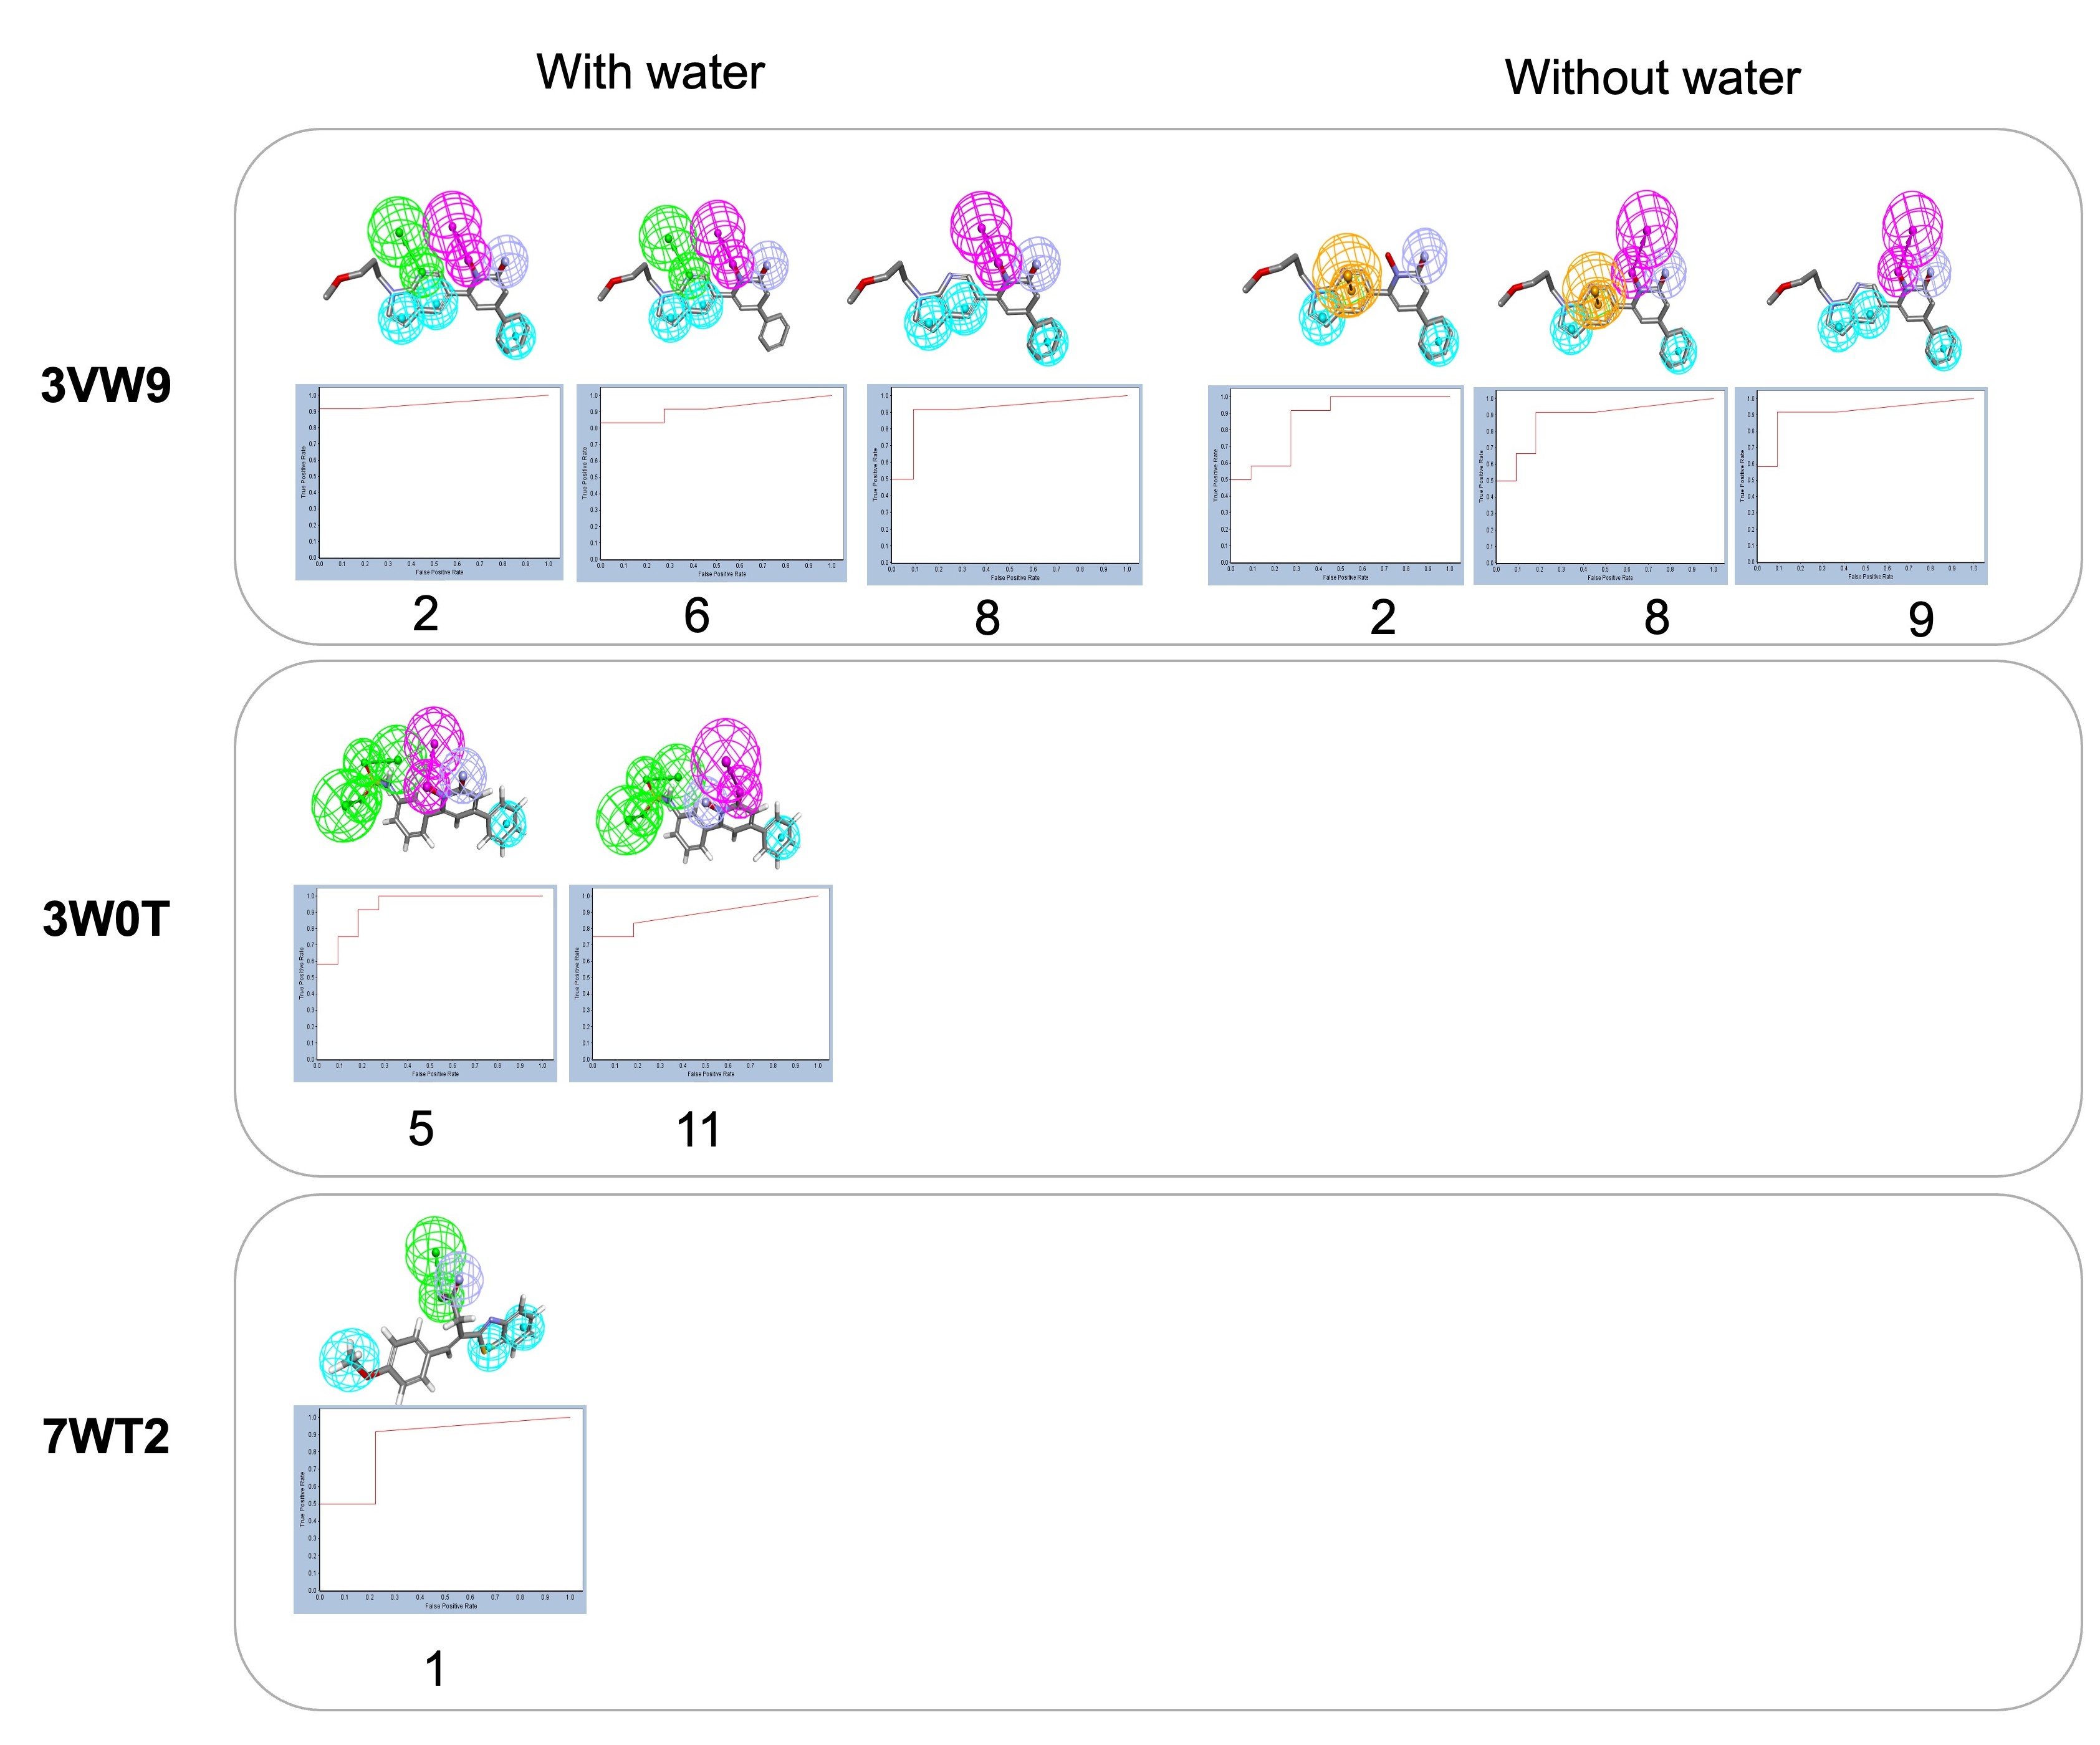
**

**Figure S2.** Pharmacophore models generated using the IG method and their corresponding ROC curves based on the following GLO-I crystal structures: PDB IDs 3VW9, 3W0T, and 7WT2. Pharmacophore features are shown as follows: HBA (green), HBD (magenta), ZBF (light purple), AR (brown), HA (blue). The numbers denote the pharmacophore model identifiers used in this study.


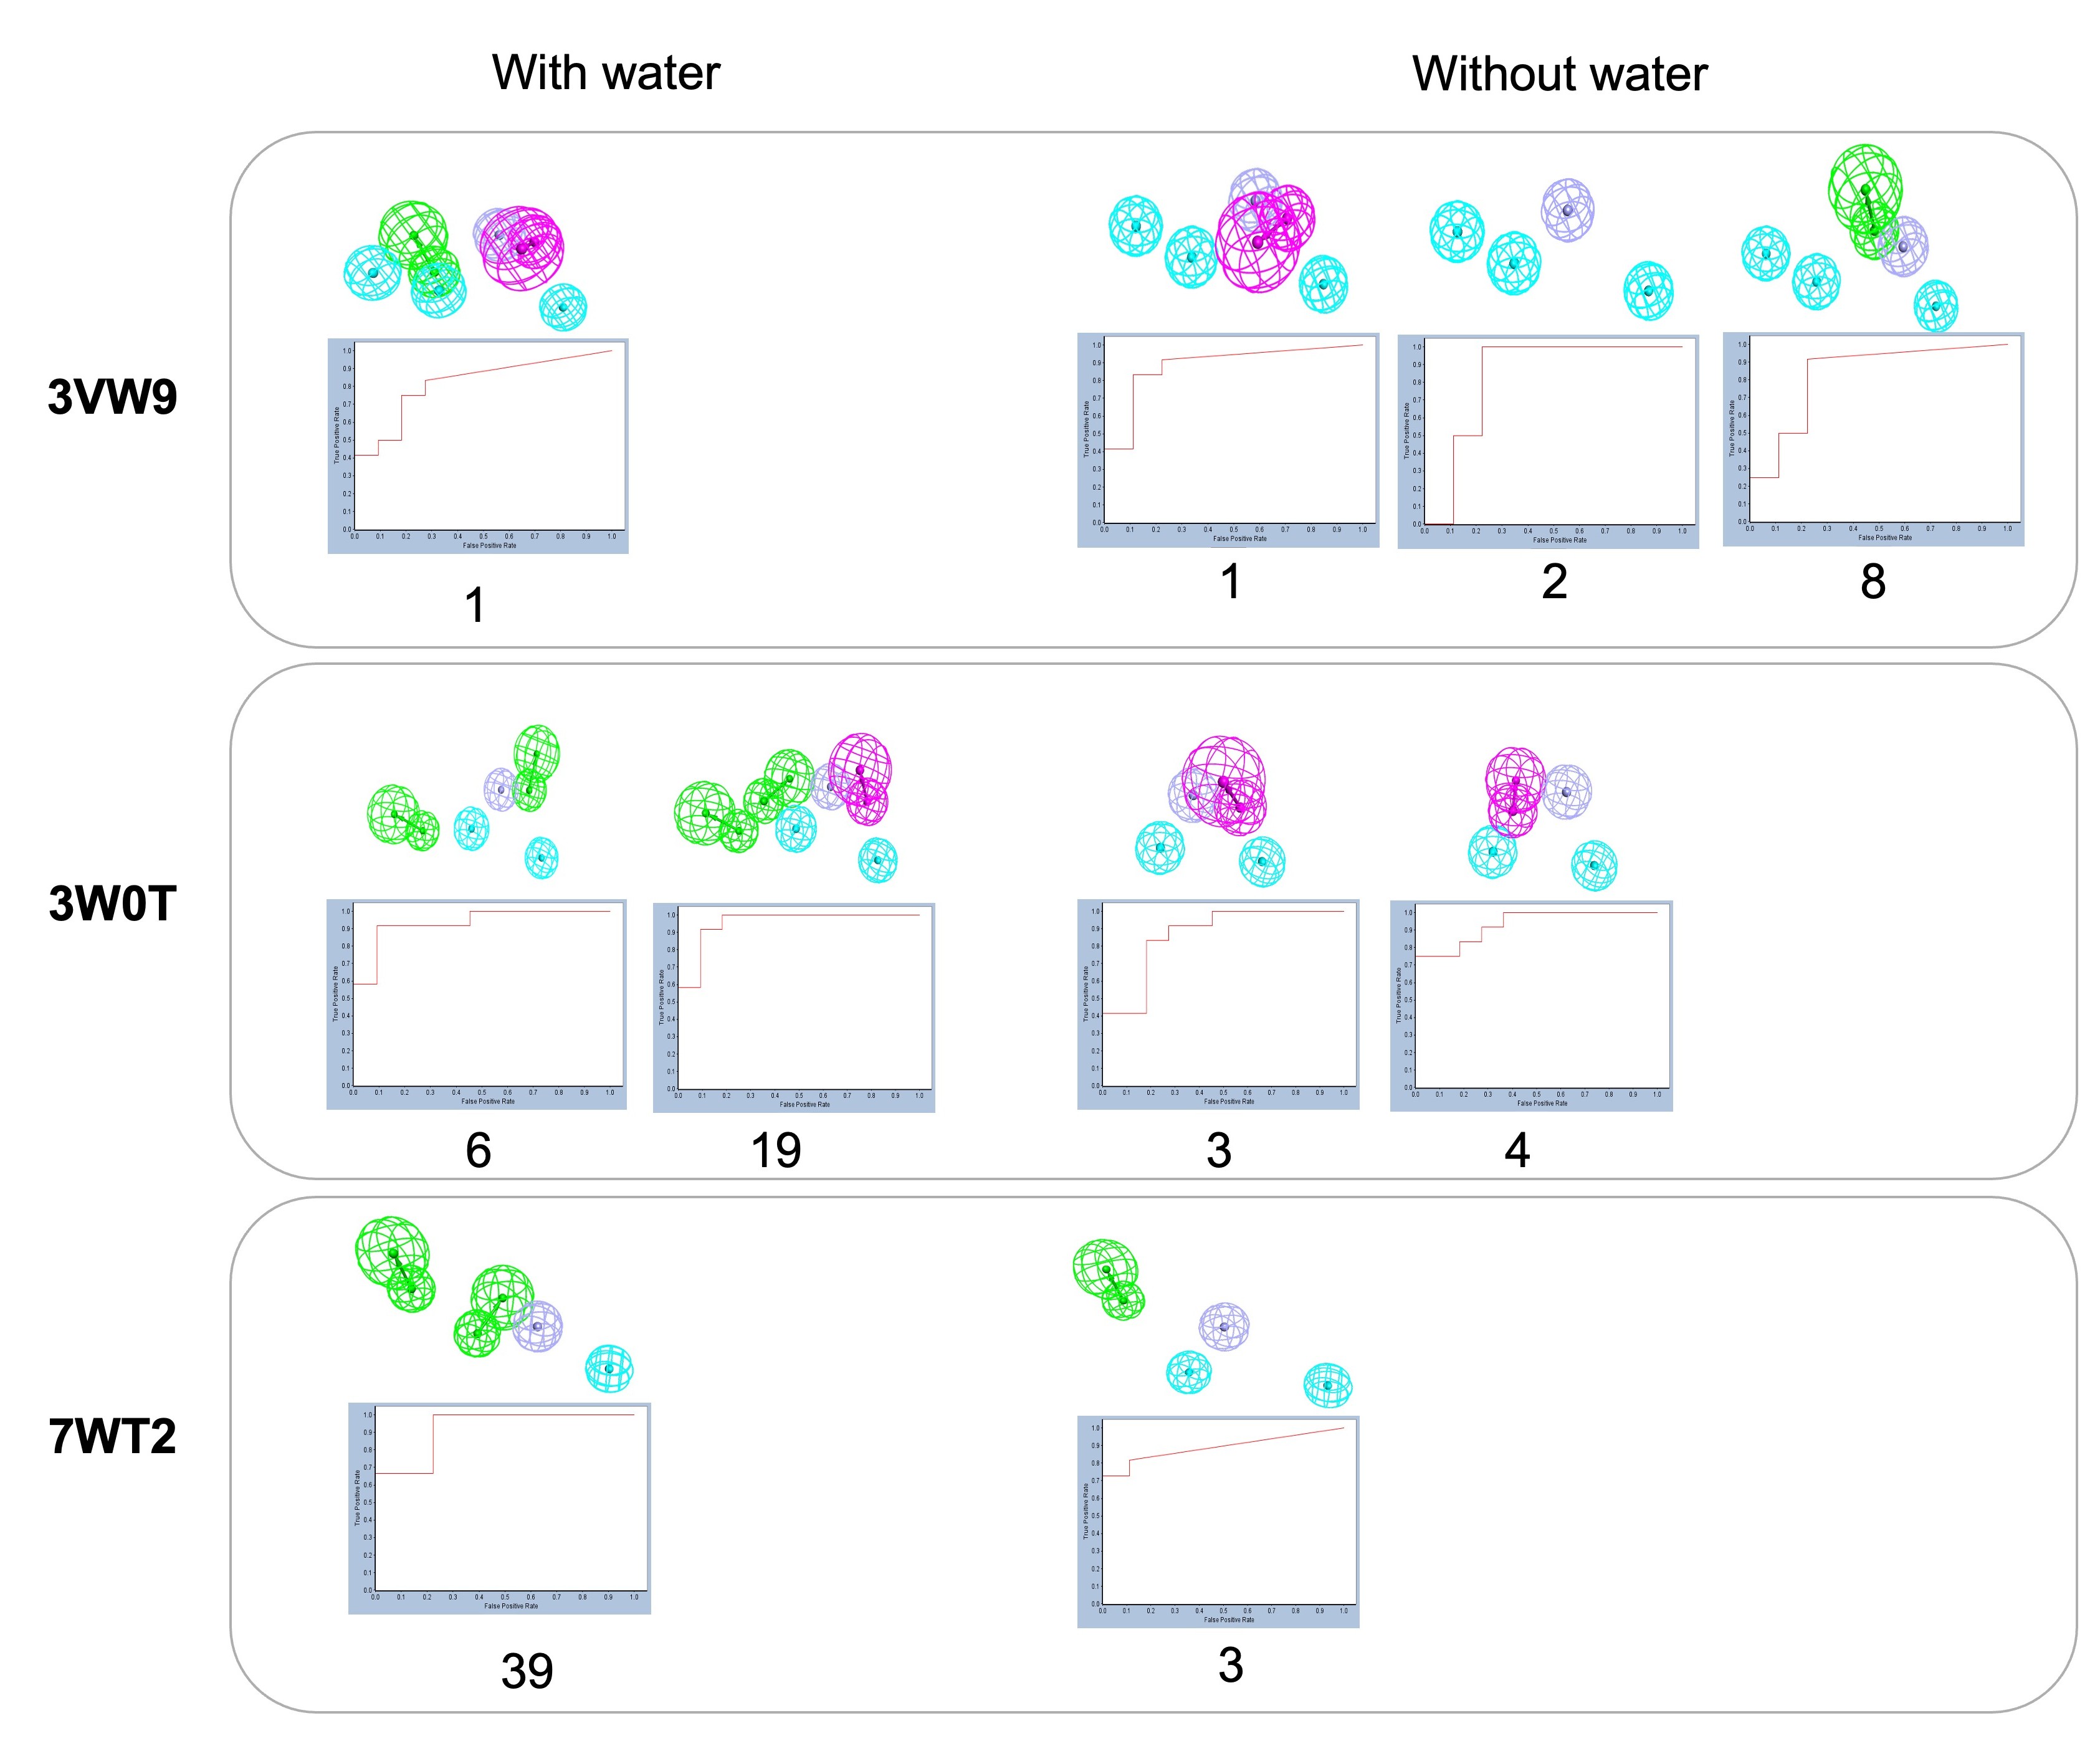

Supplement: Supplementary file 1 [file 575242%20Revised%20Supplementary%20Material.docx]
